# Supplementary material for: Experimental data using candesartan and captopril indicate no double-edged sword effect in COVID-19
Source: PubMed Central journal article supplement — Clin Sci (Lond). 2021 Feb 1;135(3):465–81. doi: 10.1042/CS20201511 (PMC7851407; doi:10.1042/cs20201511), 2021-02-01
Supplement: CS-2020-1511_supp.pdf [file CS-2020-1511_supp.pdf]

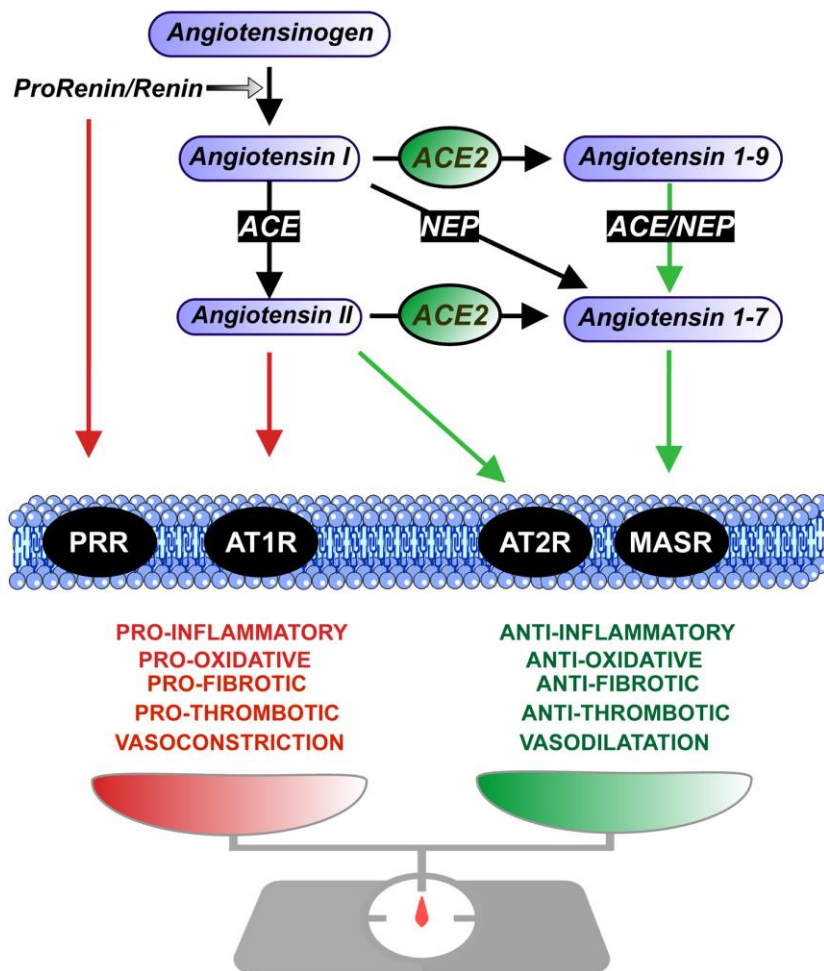

**Supplementary Figure 1.** The renin–angiotensin system (RAS) is basically organized into two arms that counteract each other: a pro-inflammatory and pro-oxidative axis (red lines) mainly formed by angiotensin II and AT1 receptors (AT1R), and an anti-inflammatory anti-oxidative axis (green lines) formed by Angiotensin II/AT2R, and particularly Angiotensin 1-7 /MasR. Angiotensin II is formed by the sequential action of two enzymes prorenin/renin (that forms angiotensin I) and angiotensin converting enzyme (ACE) on the precursor protein angiotensinogen. Renin and its precursor prorenin (PR) also act on specific PR receptors. Angiotensin converting enzyme 2 (ACE2) plays a key role in the balance, because ACE2 (together with additional peptidases such as Nephilysin, NE) transforms components of the pro-inflammatory axis (i.e. Angiotensin I and particularly Angiotensin II) into components of the anti-inflammatory axis (i.e. Angiotensin 1-9, and particularly Angiotensin 1-7).

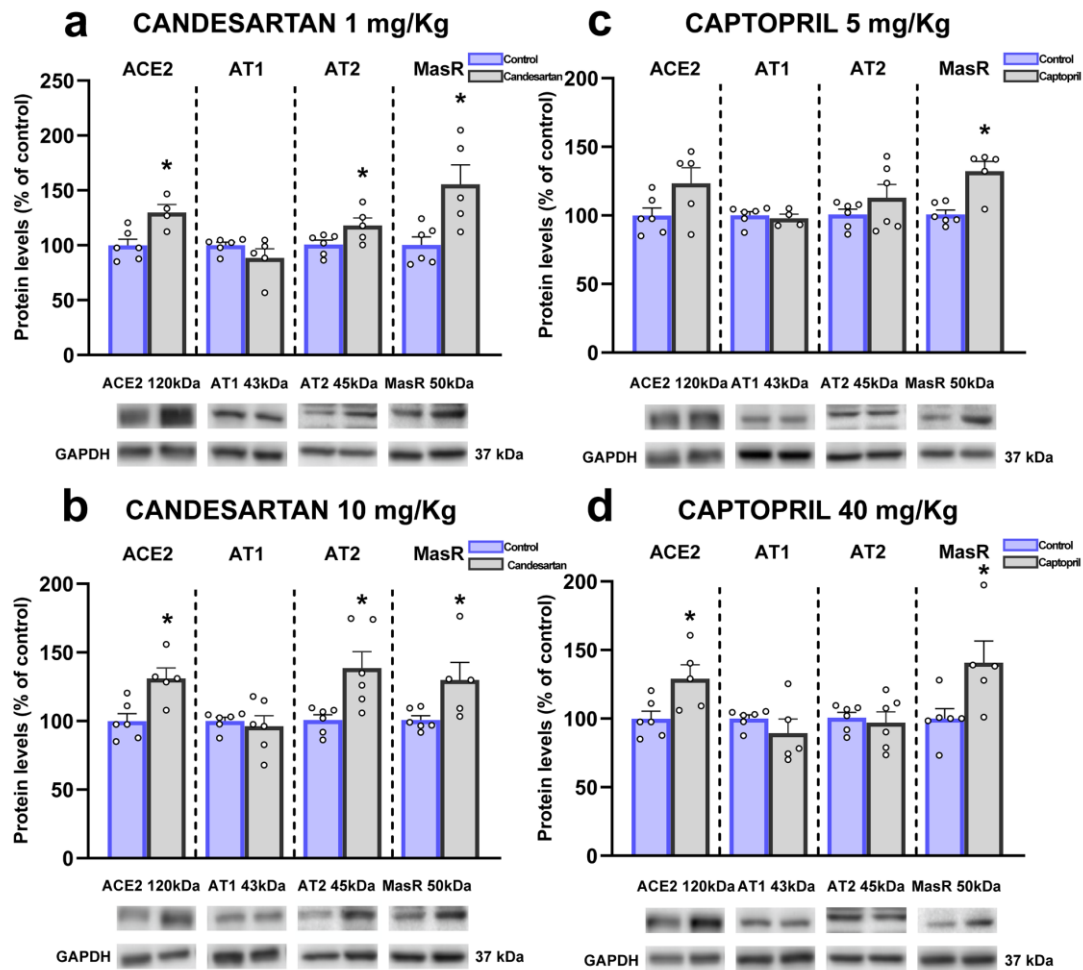

**Supplementary Figure 2.** Effects of candesartan (**a, b**) and captopril (**c, d**) on protein expression of ACE2 and AT1, AT2 and Mas receptors in the adult rat lung. Data are mean  $\pm$  SEMs. \* $p < 0.05$  relative to control group (Student's test and Mann-Whitney Rank Sum Test)

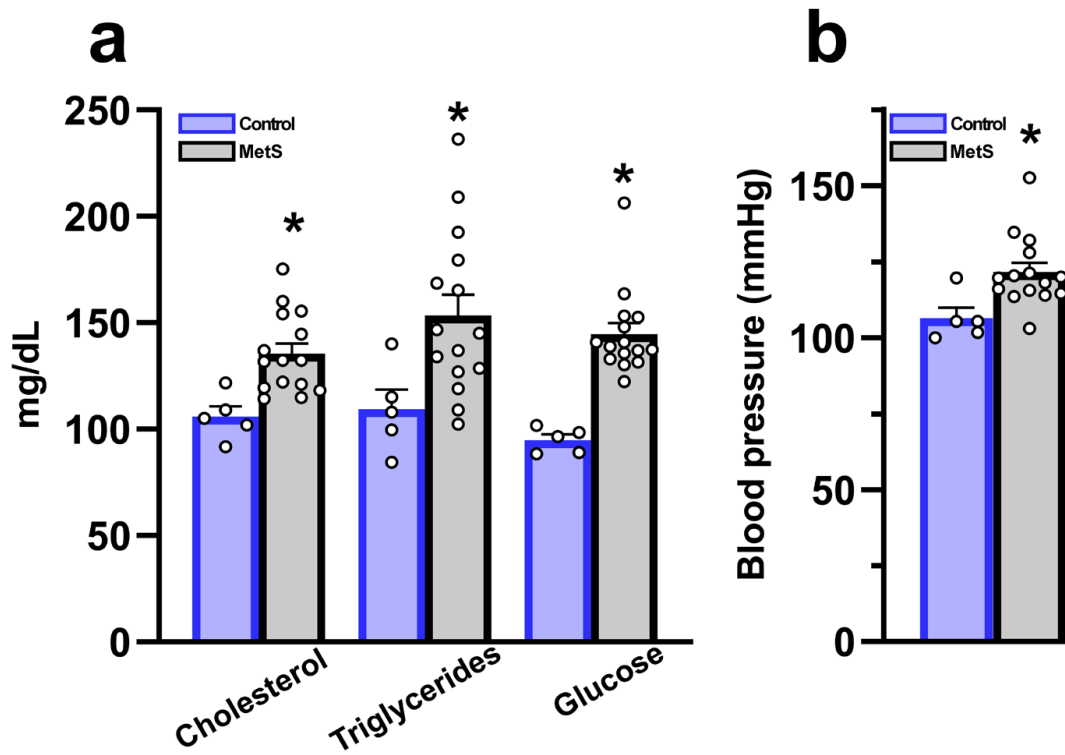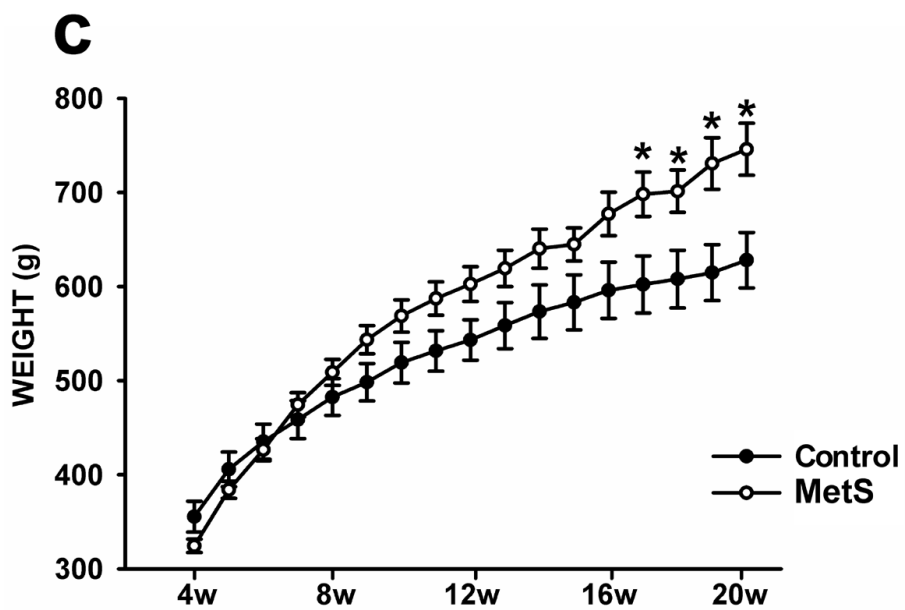

**Supplementary Figure 3.** Rats with metabolic syndrome (MetS) showed a significant increase in blood levels of cholesterol, triglycerides and glucose (**a**), significant increase in blood pressure (**b**) and increase in weight relative to control rats (**c**) (Student's test and Mann-Whitney Rank Sum Test).

## Metabolic Syndrome

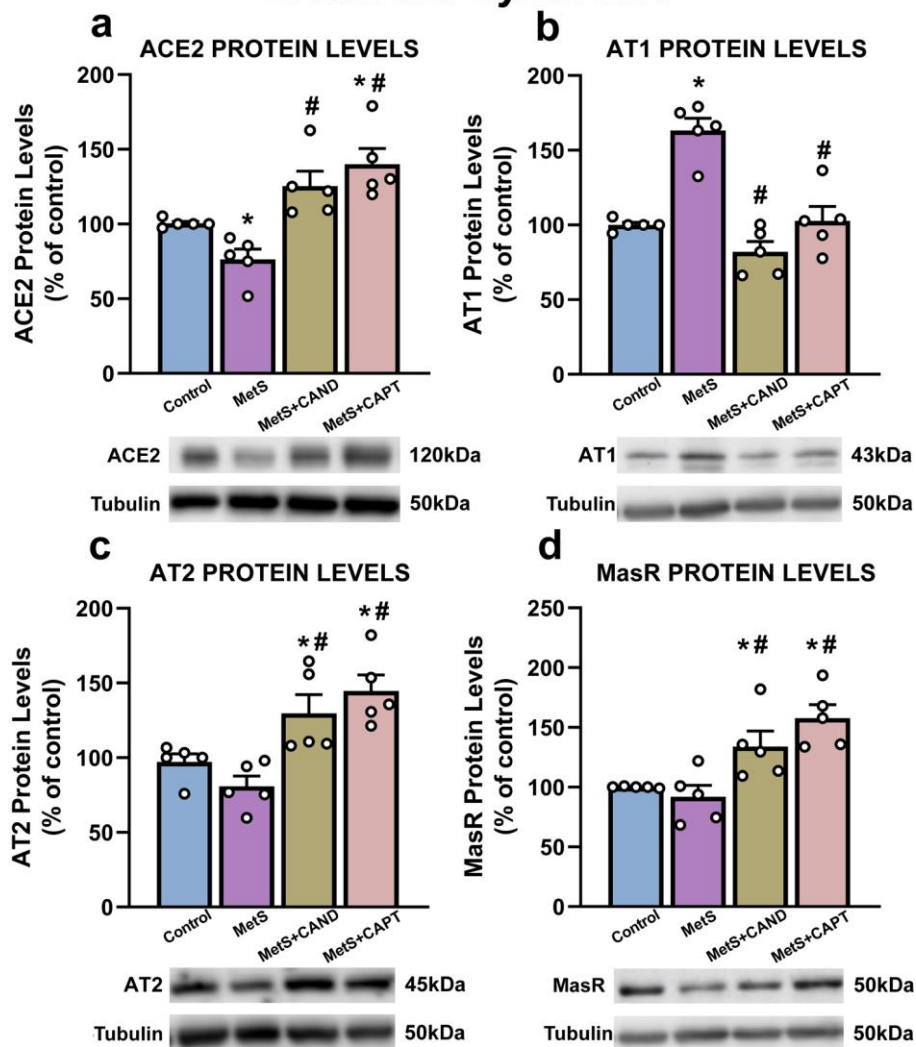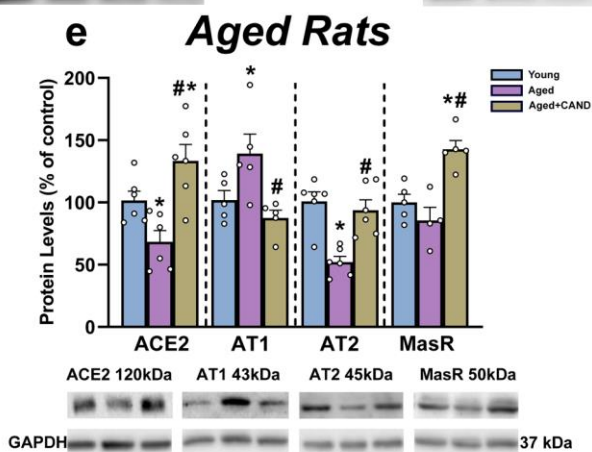

**Supplementary Figure 4.** Protein levels of ACE2 (**a**) and AT1 (**b**), AT2 (**c**) and Mas (**d**) receptors in the lung of control rats and rats with metabolic syndrome (MetS) untreated or treated with candesartan and captopril, and aged rats untreated or treated with candesartan (**e**). Data are mean  $\pm$  SEMs. \* $p < 0.05$  relative to control adult rats, # $p < 0.05$  relative to untreated rats with metabolic syndrome (**a-d**) or aged rats (**e**). (one-way ANOVA with Student-Newman-Keuls Method post hoc test or Kruskal-Wallis One Way Analysis of Variance on Ranks with Student-Newman-Keuls Method post hoc test). CAND, Candesartan; CAPT, Captopril.
